# Supplementary material for: A sampling technique for worldwide comparisons of language contact scenarios
Source: Linguist Typol. 2023 Feb 10;27(3):553–89. doi: 10.1515/lingty-2022-0005 (PMC10551743; doi:10.1515/lingty-2022-0005)
Supplement: Supplementary file 1 — Supplementary Material Details [file j_lingty-2022-0005_suppl_001.xlsx]

## Sheet: Sample Sets
Language	Glottocode	Isocode	Family	Type	SetID	Autotyp Area	Contact Zone	Sources relevant for identifying contact scenarios
Baïnounk Gubëeher	gube1234		ACG	Focus	01	African Savannah	Casamance	Cobbinah (2010)
Mandinka	mand1436	mnk	MDE	Neighbor	01	African Savannah	Casamance	Cobbinah (2010)
Bijogo	bidy1244	bjg	ACG	Benchmark	01	African Savannah	Casamance	Cobbinah (2010)
Bade	bade1248	bde	AFA	Focus	02	African Savannah	Lake Chad	Ziegelmeyer (2015)
Manga Kanuri	mang1399	kby	SAH	Neighbor	02	African Savannah	Lake Chad	Ziegelmeyer (2015)
Lele	lele1276	lln	AFA	Benchmark	02	African Savannah	Lake Chad	Ziegelmeyer (2015)
Mursi	murs1242	muz	SUR	Focus	03	Greater Abyssinia	Southwestern Ethiopia - Chad-Ethiopia	Güldemann (2018)
Hamer-Banna	hame1242	amf	SMC	Neighbor	03	Greater Abyssinia	Southwestern Ethiopia - Chad-Ethiopia	Güldemann (2018)
Tennet	tenn1246	tex	SUR	Benchmark	03	Greater Abyssinia	Southwestern Ethiopia - Chad-Ethiopia	Güldemann (2018)
Kambaata	kamb1316	ktb	AFA	Focus	04	Greater Abyssinia	Southwestern Ethiopia - Chad-Ethiopia	Treis (2012)
Wolaytta	wola1242	wal	TNO	Neighbor	04	Greater Abyssinia	Southwestern Ethiopia - Chad-Ethiopia	Treis (2012)
Xamtanga	xamt1239	xan	AFA	Benchmark	04	Greater Abyssinia	Southwestern Ethiopia - Chad-Ethiopia	Treis (2012)
Korandje	kora1291	kcy	SGY	Focus	05	North Africa	The Sahara within the Afro-Asiatic Spread Zone	Souag (2010)
Algerian Arabic	alge1239	aao	AFA	Neighbor	05	North Africa	The Sahara within the Afro-Asiatic Spread Zone	Souag (2010)
Zarma	zarm1239	dje	SGY	Benchmark	05	North Africa	The Sahara within the Afro-Asiatic Spread Zone	Souag (2010)
Nobiin	nobi1240	fia	NUB	Focus	06	North Africa	The Nile-Valley within the Afro-Asiatic Spread Zone	Güldemann (2018), Miller (1996)
Beja	beja1238	bej	AFA	Neighbor	06	North Africa	The Nile-Valley within the Afro-Asiatic Spread Zone	Güldemann (2018), Miller (1996)
Karko	kark1256	kko	NUB	Benchmark	06	North Africa	The Nile-Valley within the Afro-Asiatic Spread Zone	Güldemann (2018), Miller (1996)
Ndebele	nort2795	nde	ACG	Focus	07	Southern Africa	Kalahari	Güldemann & Fehn (2017)
Tjwao (Northern Tshwa)	tsoa1238	hio	KKW	Neighbor	07	Southern Africa	Kalahari	Güldemann & Fehn (2017)
Gyele	gyel1242	gyi	ACG	Benchmark	07	Southern Africa	Kalahari	Güldemann & Fehn (2017)
Langi/Rangi	lang1320	lag	ACG	Focus	08	Southern Africa	East-Sudan-Gregory Rift / Tanzanian Rift Valley	Gibson & Marten (2019)
Alagwa	alag1248	wbj	AFA	Neighbor	08	Southern Africa	East-Sudan-Gregory Rift / Tanzanian Rift Valley	Gibson & Marten (2019)
Zulu	zulu1248	zul	ACG	Benchmark	08	Southern Africa	East-Sudan-Gregory Rift / Tanzanian Rift Valley	Gibson & Marten (2019)
Mawng	maun1240	mph	IWA	Focus	09	North Australia	Warruwi Community	Singer (2018), Singer & Harris (2016)
Kunbarlang	kunb1251	wlg	GUN	Neighbor	09	North Australia	Warruwi Community	Singer (2018), Singer & Harris (2016)
Iwaidja	iwai1244	ibd	IWA	Benchmark	09	North Australia	Warruwi Community	Singer (2018), Singer & Harris (2016)
Burarra	bura1267	bvr	MNG	Focus	10	North Australia	Maningrida Community	Vaughan (2018)
Djinang	djin1253	dji	PMN	Neighbor	10	North Australia	Maningrida Community	Vaughan (2018)
Djeebbana	djee1236	djj	MNG	Benchmark	10	North Australia	Maningrida Community	Vaughan (2018)
Yawuru	yawu1244	ywr	NYY	Focus	11	South Australia	Northern Western Australia	Evans (2003)
Karadjeri	kara1476	gbd	PMN	Neighbor	11	South Australia	Northern Western Australia	Evans (2003)
Bardi	bard1255	bcj	NYY	Benchmark	11	South Australia	Northern Western Australia	Evans (2003)
Gascon	occi1239	oci	IEU	Focus	13	Europe	Southwestern Europe	Haase (1992)
Basque	basq1248	eus	BAS	Neighbor	13	Europe	Southwestern Europe	Haase (1992)
Ligurian	ligu1248	lij	IEU	Benchmark	13	Europe	Southwestern Europe	Haase (1992)
Maltese	malt1254	mlt	AFA	Focus	14	Europe	The Mediterranean	Sansò (2011)
Sicilian	sici1248	scn	IEU	Neighbor	14	Europe	The Mediterranean	Sansò (2011)
Gulf Arabic	gulf1241	afb	AFA	Benchmark	14	Europe	The Mediterranean	Sansò (2011)
Yurok	yuro1248	yur	ALG	Focus	15	California	Northwestern California	Conathan (2004)
Karok	karo1304	kyh	KYH	Neighbor	15	California	Northwestern California	Conathan (2004)
Naskapi	nask1242	nsk	ALG	Benchmark	15	California	Northwestern California	Conathan (2004)
Cupeno	cupe1243	cup	UAZ	Focus	16	California	Southern California	Hinton (1991)
Tipai/Jamul Tiipay	kumi1248	dih	CCY	Neighbor	16	California	Southern California	Hinton (1991)
Huarijio	huar1255	var	UAZ	Benchmark	16	California	Southern California	Hinton (1991)
Eastern Canadian Inuktitut	east2534	ike	ESK	Focus	17	Eastern North America	Eastern Hudson Bay	Barger (1979)
Northern East Cree	nort1552	crl	ALG	Neighbor	17	Eastern North America	Eastern Hudson Bay	Barger (1979)
Tunumiisiut	tunu1234		ESK	Benchmark	17	Eastern North America	Eastern Hudson Bay	Barger (1979)
Choctaw	choc1276	cho	MUS	Focus	18	Eastern North America	Lower Missisipi	Kaufman (2014, 2019, 2020)
Biloxi	bilo1248	bll	SUX	Neighbor	18	Eastern North America	Lower Missisipi	Kaufman (2014, 2019, 2020)
Creek	cree1270	mus	MUS	Benchmark	18	Eastern North America	Lower Missisipi	Kaufman (2014, 2019, 2020)
Garifuna	gari1256	cab	AWK	Focus	19	Mesoamerica	Caribbean	Michelle Ocasio (personal communication)
French	stan1290	fra	IEU	Neighbor	19	Mesoamerica	Caribbean	Michelle Ocasio (personal communication)
Ashéninka Perené	ashe1272	prq	AWK	Benchmark	19	Mesoamerica	Caribbean	Michelle Ocasio (personal communication)
Pipil	pipi1250	ppl	UAZ	Focus	20	Mesoamerica		Campbell (1985)
Kaqchikel	kaqc1270	cak	MYN	Neighbor	20	Mesoamerica		Campbell (1985)
Yaqui	yaqu1251	yaq	UAZ	Benchmark	20	Mesoamerica		Campbell (1985)
Papapana	papa1265	ppn	AUN	Focus	21	Oceania	Northwestern Melanesia/Melanesia	Smith-Dennis (2016, 2021)
Rotokas	roto1249	roo	NOL	Neighbor	21	Oceania	Northwestern Melanesia/Melanesia	Smith-Dennis (2016, 2021)
Marshallese	mars1254	mah	AUN	Benchmark	21	Oceania	Northwestern Melanesia/Melanesia	Smith-Dennis (2016, 2021)
Alorese	alor1247	aol	AUN	Focus	22	Oceania	East Nusantara	Klamer (2012); Moro (2018, 2019)
Adang	adan1251	adn	TLP	Neighbor	22	Oceania	East Nusantara	Klamer (2012; Moro (2018, 2019)
Lewoingu Lamaholot	lama1277	slp	AUN	Benchmark	22	Oceania	East Nusantara	Klamer (2012); Moro (2018, 2019)
(North) Tehuelche	tehu1242	teh	CHN	Focus	23	Andean	Northern Coastal Peru	Virkel (2005)
Mapuche	mapu1245	arn	ARC	Neighbor	23	Andean	Northern Coastal Peru	Virkel (2005)
Selk'nam	onaa1245	ona	CHN	Benchmark	23	Andean	Northern Coastal Peru	Virkel (2005)
Cusco Quechua	cusc1236	quz	QUE	Focus	24	Andean	Quechumaran	Emlen (2020)
Matsigenka	mach1267	mcb	AWK	Neighbor	24	Andean	Quechumaran	Emlen (2020)
South Bolivian Quechua	sout2991	quh	QUE	Benchmark	24	Andean	Quechumaran	Emlen (2020)
Gardabani Neo-Aramaic	boht1238	bhn	AFA	Focus	25	Greater Mesopotamia	Western Asia	Khan (2018)
Northern/Kurmanji Kurdish	nort2641	kmr	IEU	Neighbor	25	Greater Mesopotamia	Western Asia	Khan (2018)
Modern Hebrew	hebr1245	heb	AFA	Benchmark	25	Greater Mesopotamia	Western Asia	Khan (2018)
Zazaki/Zaza	lazz1240	zza	IEU	Focus	26	Greater Mesopotamia	(East) Anatolia	Haig (2017), Lacroix (2009)
Turkish	nucl1301	tur	TUK	Neighbor	26	Greater Mesopotamia	(East) Anatolia	Haig (2017), Lacroix (2009)
Western Balochi	west2368	bgn	IEU	Benchmark	26	Greater Mesopotamia	(East) Anatolia	Haig (2017), Lacroix (2009)
Santali	sant1410	sat	ATC	Focus	27	Indic	Jharkhand	Peterson (2010)
Bengali	beng1280	ben	IEU	Neighbor	27	Indic	Jharkhand	Peterson (2010)
Gata'	gata1239	gaq	ATC	Benchmark	27	Indic	Jharkhand	Peterson (2010)
Kupwar Marathi	mara1378	mar	IEU	Focus	28	Indic	India	Kulkarni-Joshi (2016)
Kupwar Kannada	nucl1305	kan	DRA	Neighbor	28	Indic	India	Kulkarni-Joshi (2016)
Chakma	chak1266	ccp	IEU	Benchmark	28	Indic	India	Kulkarni-Joshi (2016)
Wutunhua/Wutun	wutu1241	wuh	STB	Focus	29	Inner Asia	Amdo	Janhunen (2007)
Bonan	bona1250	peh	MLK	Neighbor	29	Inner Asia	Amdo	Janhunen (2007)
Cantonese	cant1236		STB	Benchmark	29	Inner Asia	Amdo	Janhunen (2007)
Xibe	xibe1242	sjo	TSI	Focus	30	Inner Asia	Siberia	Pakendorf (2010)
Uighur	uigh1240	uig	TUK	Neighbor	30	Inner Asia	Siberia	Pakendorf (2010)
Even	even1260	eve	TSI	Benchmark	30	Inner Asia	Siberia	Pakendorf (2010)
Central Siberian Yupik	nauk1242	ess	ESK	Focus	31	North Coast Asia	Pacific Rim	de Reuse (1994)
Chukchi	chuk1273	ckt	CHU	Neighbor	31	North Coast Asia	Pacific Rim	de Reuse (1994)
Central Alaskan Yupik	cent2127	esu	ESK	Benchmark	31	North Coast Asia	Pacific Rim	de Reuse (1994)
Sakha/Yakut	yaku1245	sah	TUK	Focus	32	North Coast Asia	Lower Kolyma	Pupynina and Aralova (2021)
Northern/Tundra Yukaghir	nort2745	ykg	YKG	Neighbor	32	North Coast Asia	Lower Kolyma	Pupynina and Aralova (2021)
Taiga Sayan Turkic	kara1462	kim	TUK	Benchmark	32	North Coast Asia	Lower Kolyma	Pupynina and Aralova (2021)
Muak Sa-Aak	tail1246	tlq	ATC	Focus	33	Southeast Asia	Mainland Southeast Asia	Hall (2010, 2014), Jenny (2015)
Lü/Tai Lue	luuu1242	khb	TAI	Neighbor	33	Southeast Asia	Mainland Southeast Asia	Hall (2010, 2014), Jenny (2015)
Pnar	pnar1238	pbv	ATC	Benchmark	33	Southeast Asia	Mainland Southeast Asia	Hall (2010, 2014), Jenny (2015)
Burmese	nucl1310	mya	STB	Focus	34	Southeast Asia	Mainland Southeast Asia	Hall (2010, 2014), Jenny (2015)
Mon	monn1252	mnw	ATC	Neighbor	34	Southeast Asia	Mainland Southeast Asia	Hall (2010, 2014), Jenny (2015)
Kurtokha/Kurtöp	kurt1248	xkz	STB	Benchmark	34	Southeast Asia	Mainland Southeast Asia	Hall (2010, 2014), Jenny (2015)
Aleut	aleu1260	ale	ESK	Focus	35	Alaska-Oregon	Northern Northwest Coast	Leer (1991), Enrico (2004)
Eyak	eyak1241	eya	AET	Neighbor	35	Alaska-Oregon	Northern Northwest Coast	Leer (1991), Enrico (2004)
Central Alaskan Yupik	cent2127	esu	ESK	Benchmark	35	Alaska-Oregon	Northern Northwest Coast	Leer (1991), Enrico (2004)
Nuxalk/Bella Coola	bell1243	blc	SLS	Focus	36	Alaska-Oregon	Central Northwest	Beck (2000)
Kwak'wala	kwak1269	kwk	WAK	Neighbor	36	Alaska-Oregon	Central Northwest	Beck (2000)
Okanagan	okan1243	oka	SLS	Benchmark	36	Alaska-Oregon	Central Northwest	Beck (2000)
Towa	jeme1245	tow	KWT	Focus	37	Basin and Plains	Eastern Pueblo	Shaul & Ortman (2014)
Eastern Keres	east1472	kee	KES	Neighbor	37	Basin and Plains	Eastern Pueblo	Shaul & Ortman (2014)
Kiowa	kiow1266	kio	KWT	Benchmark	37	Basin and Plains	Eastern Pueblo	Shaul & Ortman (2014)
Hopi	hopi1249	hop	UAZ	Focus	38	Basin and Plains	Western Pueblo	Shaul & Ortman (2014)
Zuni	zuni1245	zun	ZUN	Neighbor	38	Basin and Plains	Western Pueblo	Shaul & Ortman (2014)
Ute-Southern Paiute	utes1238	ute	UAZ	Benchmark	38	Basin and Plains	Western Pueblo	Shaul & Ortman (2014)
Huli	huli1244	hui	NTN	Focus	39	Interior New Guinea	New Guinea Highlands	San Roque & Loughane (2012)
Duna	duna1248	duc	DUN	Neighbor	39	Interior New Guinea	New Guinea Highlands	San Roque & Loughane (2012)
South Awyu	sout2941	aws	NTN	Benchmark	39	Interior New Guinea	New Guinea Highlands	San Roque & Loughane (2012)
Ipili	ipil1240	ipi	NTN	Focus	40	Interior New Guinea	New Guinea Highlands	Fedden (2011)
Hewa	hewa1241	ham	SEP	Neighbor	40	Interior New Guinea	New Guinea Highlands	Fedden (2011)
Mauwake	mauw1238	mhl	NTN	Benchmark	40	Interior New Guinea	New Guinea Highlands	Fedden (2011)
Kwoma	kwom1262	kmo	SEP	Focus	41	North Coast New Guinea	North Coast New Guinea	Ross (1996)
Manambu	mana1298	mle	NDU	Neighbor	41	North Coast New Guinea	North Coast New Guinea	Ross (1996)
Awtuw	awtu1239	amp	SEP	Benchmark	41	North Coast New Guinea	North Coast New Guinea	Ross (1996)
Paluai	balu1257	blq	AUN	Focus	42	North Coast New Guinea	North Coast New Guinea	Reesink & Dunn (2017)
Tok Pisin	tokp1240	tpi	IEU	Neighbor	42	North Coast New Guinea	North Coast New Guinea	Reesink & Dunn (2017)
Mono-Alu	mono1273	mte	AUN	Benchmark	42	North Coast New Guinea	North Coast New Guinea	Reesink & Dunn (2017)
Coastal Marind	nucl1622	mrz	ANM	Focus	43	Southern New Guinea	Trans-Fly	Evans (2012), Olsson (2017)
Marori	moro1289	mok	MRR	Neighbor	43	Southern New Guinea	Trans-Fly	Evans (2012), Olsson (2017)
Jaqay/Yakhai	yaqa1246	jaq	ANM	Benchmark	43	Southern New Guinea	Trans-Fly	Evans (2012), Olsson (2017)
Kala Lagaw Ya	kala1377	mwp	PMN	Focus	44	Southern New Guinea	Trans-Fly	Evans (2012); Evans et al. (2018)
Meryam Mir/Meri	meri1244	ulk	ETF	Neighbor	44	Southern New Guinea	Trans-Fly	Evans (2012); Evans et al. (2018)
Umpila	umpi1239	ump	PMN	Benchmark	44	Southern New Guinea	Trans-Fly	Evans (2012); Evans et al. (2018)
Nen	nenn1238	nqn	YAM	Focus	45	Southern New Guinea	Trans-Fly	Evans (2012); Evans et al. (2018)
Idi-Taeme	idii1243	idi	PHR	Neighbor	45	Southern New Guinea	Trans-Fly	Evans (2012); Evans et al. (2018)
(Ngkontar) Ngkolmpu	ngka1235	kcd	YAM	Benchmark	45	Southern New Guinea	Trans-Fly	Evans (2012); Evans et al. (2018)
Kuikuro-Kalapalo	kuik1246	kui	CRB	Focus	46	Northeast South America	Upper Xingu	Franchetto (2011)
Trumai	trum1247	tpy	TRM	Neighbor	46	Northeast South America	Upper Xingu	Franchetto (2011)
Pará Arára	para1310	aap	CRB	Benchmark	46	Northeast South America	Upper Xingu	Franchetto (2011)
Mekens	saki1248	skf	TPN	Focus	47	Northeast South America	Mamoré-Guaporé/Grande Rondônia	Crevels & van der Voort (2008)
Aikanã	aika1237	tba	AIK	Neighbor	47	Northeast South America	Mamoré-Guaporé/Grande Rondônia	Crevels & van der Voort (2008)
Akuntsu	akun1241	aqz	TPN	Benchmark	47	Northeast South America	Mamoré-Guaporé/Grande Rondônia	Crevels & van der Voort (2008)
Yuhup	yuhu1238	yab	NHP	Focus	48	Northeast South America	Vaupés	Aikhenvald (2011)
Macuna	macu1260	myy	TCA	Neighbor	48	Northeast South America	Vaupés	Aikhenvald (2011)
Nadëb	nade1244	mbj	NHP	Benchmark	48	Northeast South America	Vaupés	Aikhenvald (2011)
Western Toba	toba1269	tob	GUA	Focus	49	Southeast South America	Gran Chaco	Messineo (2011) Messineo & Tacconi (2017), Vidal & Braunstein (2020)
Wichí Noctén	wich1262	mtp	MTC	Neighbor	49	Southeast South America	Gran Chaco	Messineo (2011) Messineo & Tacconi (2017), Vidal & Braunstein (2020)
Kadiwéu	kadi1248	kbc	GUA	Benchmark	49	Southeast South America	Gran Chaco	Messineo (2011) Messineo & Tacconi (2017), Vidal & Braunstein (2020)
Nivaclé	niva1238	cag	MTC	Focus	50	Southeast South America	Gran Chaco	Campbell (2013)
Enxet Sur	sout2989	enx	LMC	Neighbor	50	Southeast South America	Gran Chaco	Campbell (2013)
Chorote	iyoj1235	crt	MTC	Benchmark	50	Southeast South America	Gran Chaco	Campbell (2013)

## Sheet: References
Aikhenvald, Alexandra Y. 2011. Areal features and linguistic areas: Contact-induced change and geographical typology. In Osamu Hieda and Christa König and Hirosi Nakagawa (eds.), Geographical Typology and Linguistic Areas: With Special Reference to Africa, 13-39. Amsterdam/Philadelphia: Amsterdam: John Benjamins.
Bakker, Dik & Hekking, Ewald. (2010). Is Otomí creating a new lexical class for the modification of noun phrases as a result of the contact with Spanish?. Language Typology and Universals, v.63, 5-19 (2010). 63. 10.1524/stuf.2010.0002.
Barger, W.K. (1979) Inuit-Cree Relations in the Eastern Hudson Bay Region. Arctic Anthropology,16(2) 59-75
Beck, David. 2000. Grammatical Convergence and the Genesis of Diversity in the Northwest Coast Sprachbund. Anthropological Linguistics 42. 147-213
Campbell, Eric W. 2017. Otomanguean historical linguistics: past, present and prospects for the future. Language & Linguistics Compass 11: e12240
Campbell, Lyle, Terrence Kaufman, and Thomas Smith-Stark. 1986. Mesoamerica as a linguistic area. Language 62:530-70.
Campbell, Lyle. 1997. American Indian Languages. Oxford: Oxford University Press
Campbell, Lyle. 2013. Language Contact and Linguistic Change in the Chaco. In Ana Suelly Arruda Câmara Cabral & Jorge Domingues Lopes (eds.) Encontro internacional arqueologia e linguística histórica das línguas indígenas sulamericanas. Special issue of Revista Brasileira de Linguística Antropológica 5(2):259-91.
Cobbinah, A. The Casamance as an area of intense language contact: The case of Baïnounk Gubaher Journal of Language Contact, Brill, 2010, 3, 175-202
Conathan, Lisa 2004. Linguistic ecology of Northwestern California: Contact, functional convergence and dialectology. Ph.D. dissertation in linguistics, University of California, Berkeley.
Crevels, Mily and Hein van der Voort. 2008. The Guaporé-Mamoré region as a linguistic area. In Pieter Muysken (ed.), From linguistic areas to areal linguistics, 151-179. Amsterdam: John Benjamins.
de Reuse, Willem Joseph. 1994. Siberian Yupik Eskimo: the Language and its Contacts with Chukchi. (Studies in Indigenous Languages of the Americas.) Salt Lake City: University of Utah Press.
Devi, Hajarimayum S. (2004). Loanwords in Manipuri and their impact. Linguistics of the Tibeto-Burman Area 27, 29-60.
Dunn, Michael and Terrill, Angela. 2012. Assessing the lexical evidence for a Central Solomons Papuan family using the Oswalt Monte Carlo Test. Diachronica 29(1). 1-27
Elizabeth Hall. 2010. A Phonology of Muak Sa-aak. (MA thesis, Chiang Mai: Payap University; 200pp.)
Emlen, Nicholas Q. 2016. Multilingualism in the Andes and Amazonia: a view from in-between. Journal of Latin American and Caribbean Anthropology. doi: 10.1111/ jlca.12250.
Emlen, Nicholas Q. 2020. Language, coffee and migration on an Andean-Amazonian frontier. Tuscon: The University of Arizona Press.
Enrico, John. 2004. Towards Proto-Na-Dene. Anthropological Linguistics 46. 229-302.
Evans, Nicholas (ed.). 2003. The non-Pama-Nyungan languages of northern Australia: Comparative Studies of the continent's most linguistically complex region. Canberra: Research School of Pacific and Asian Studies, Australian National University.
Evans, Nicholas, Wayan Arka, Matthew Carroll, Yun Jung Choi, Christian Döhler, Volker Gast, Eri Kashima, Emil Mittag, Bruno Olsson, Kyla Quinn, Dineke Schokkin, Philip Tama, Charlotte van Tongeren and Jeff Siegel. 2018. The Languages of Southern New Guinea. In Bill Palmer (ed.), Papuan Languages and Linguistics, 641-894. Berlin: Mouton.
Evans, Nicholas. 2012. Even more diverse than we had thought: The multiplicity of Trans-Fly languages. In Nicholas Evans and Marian Klamer (eds.), Melanesian Languages on the Edge of Asia: Challenges for the 21st Century, 109-149. Honolulu: University of Hawaii Press.
Fedden, Sebastian Olcher. 2011. A Grammar of Mian. (Mouton Grammar Library, 55.) Berlin, Boston: Berlin: Mouton de Gruyter. xxv+604pp.
Franchetto, Bruna. 2011. Evidências linguísticas para o entendimento de uma sociedade multilíngue: O Alto Xingu. In Bruna Franchetto (ed.), Alto Xingu: uma sociedade multilíngue, 3-38. Rio de Janeiro: Museu do Indio- FUNAI.
Gibson, Hannah and Marten, Lutz (2019) Probing the interaction of language contact and internal innovation: four case studies of morphosyntactic change in Rangi. Studies In African Linguistics, 48 (2019). 63 - 92.
Güldemann, Tom & Anne-Maria Fehn. 2017. The Kalahari Basin area as a “Sprachbund” before the Bantu expansion. In Hickey (ed.), 500–526.
Güldemann, Tom. 2018. Areal linguistics beyond contact, and linguistic areas of Afrabia. In Tom Güldemann (ed.), The languages and linguistics of Africa, 448–545. Berlin: Mouton de Gruyter.
Haase, Martin 1992 Sprachkontakt und Sprachwandel im Baskenland: Die Einflüsse des Gaskognischen und Französischen auf das Baskische. Hamburg: Buske.
Haase, Martin 2011. Basque. In Kortmann, Bernd and Johan van der Auwera (eds) The languages and linguistics of Europe: A comprehensive Guide. Berlin: Mouton de Gruyter
Haig, Geoffrey. 2017. Western Asia: East Anatolia as a Transition Zone. In: Hickey, Raymond (ed.), The Cambridge Handbook of Areal Linguistics, 396-423. Cambridge: Cambridge University Press.
Hall, E. 2014. An analysis of muak sa-aak tone. Journal of the Southeast Asian Linguistics Society. 7. 1-10.
Hieda, Osamu, Christa König & Hirosi Nakagawa (eds.). 2011. Geographical typology and linguistic areas, with special reference to Africa (Tokyo University of Foreign Studies, Studies in Linguistics 2). Amsterdam: John Benjamins.
Hill, Jane A. 2005. A Grammar of Cupeño. (University of California Publications in Linguistics, 136.) Berkeley and Los Angeles: University of California Press. xviii+531pp. (Includes bibliographical references and index).
Hinton. Leanne, "Takic and Yuman: A Study in Phonological Convergence," International Journal of American Linguistics 57, no. 2 (Apr., 1991): 133-157.
Janhunen, Juha. 2007. The changing faces of Amdo Qinghai. Studia Orientalia 101. 501-510
Karen Dakin, Claudia Parodi & Natalie Operstein (eds.). 2017. Language Contact and Change in Mesoamerica and Beyond (Studies in Language Companion Series 185). Amsterdam: Benjamins.
Kaufman, David. 2014. The Lower Mississippi Valley as a Language Area. PhD dissertation. University of Kansas.
Kaufman, David. 2019a. Clues to Lower Mississippi Valley histories: language, archaeology, ethnography. Lincoln: University of Nebraska Press.
Kaufman, David. 2020. The Lower Mississippi Valley as a Linguistic Area In Grant, Anthony P.(ed) The Oxford Handbook of Language Contact
Khan, Geoffrey. 2018 "The Neo-Aramaic dialects of western Iran". The Languages and Linguistics of Western Asia: An Areal Perspective, edited by Geoffrey Haig and Geoffrey Khan, Berlin, Boston: De Gruyter Mouton, pp. 481-532. https://doi.org/10.1515/9783110421682-015
Kießling, Roland, Maarten Mous & Derek Nurse. 2008. The Tanzanian Rift Valley area. In Heine & Nurse (eds.), 186–227.
Klamer, M., Reesink, G., & van Staden, M. (2008). East Nusantara as a linguistic area. In Muysken, P. (ed) From linguistic areas to areal linguistics. 95-149. Amesterdam: John Benjamins
Klamer, Marian. 2012. Papuan-Austronesian language contact: Alorese from an areal perspective. In Marian Klamer and Nicholas Evans (eds.), Melanesian languages on the Edge of Asia: Challenges for the 21th Century, 72–108. Honolulu, HI: University of Hawaiʻi Press.
Kulkarni-Joshi, Sonal. 2016. Forty years of language contact and change in Kupwar: A critical assessment of the intertranslatability model. Journal of South Asian Languages and Linguistics, 3(2), 147-174. https://doi.org/10.1515/jsall-2016-0008
Lacroix, René. 2009, Laz relative clauses in a typological and areal perspective, In : Austin, Peter K., Oliver Bond, Monik Charette, David Nathan & Peter Sells (eds), Language Documentation and Linguistic Theory 2, Londres : SOAS. 10 p.
Leer, Jeff. 1991. Evidence for a Northern Northwest Coast language area: promiscuous number marking and periphrastic possessive constructions in Haida, Eyak, and Aleut. International Journal of American Linguistics 57. 158-193.
Mathias Jenny. 2015. Modern Mon. In Paul Sidwell and Mathias Jenny (eds.), The Handbook of Austroasiatic Languages, 553-600. Leiden: Brill.
Messineo, Cristina, and Temis Lucía Tacconi. "Problemas y desafios de la traducción de las Lenguas Indígenas: Los casos Toba y Maká de la región del Gran Chaco (Argentina y Paraguay)." Cadernos de Tradução 37 (2017): 92-116.
Messineo, Cristina. "Aproximación tipológica a las lenguas indígenas del Gran Chaco. Rasgos compartidos entre toba (familia guaycurú) y maká (familia mataco-mataguayo)." Indiana 28 (2011): 183-225.
Miller, Chatherine. 1996. Nubien, berbère et beja : notes sur trois langues vernaculaires non arabes de l’Égypte contemporaine. Égypte/Monde arabe [en ligne]. 411–431. DOI : 10.4000/ema.1960 .
Mithun, Marianne. 2015. Language contact in North America. In Evangelia Adamou and Yaron Matras (eds) The Routledge Handbook of Language Contact 503-527. New York: Routledge
Mithun, Marienne. 2015. Morphological Complexity and Language Contact in Languages Indigenous to North America. Linguistic discovery 13(2). 37-59
Moro, Francesca. 2018. The plural word hire in Alorese: Contact-induced change from neighboring Alor-Pantar Languages. Oceanic Linguistics 57(1). 178-198.
Moro, Francesca. 2019. Loss of morphology in Alorese (Austronesian): Simplificatiom in adult language contact. Journal of Language Contact 12 (2) 378-403
Olsson, Bruno. 2017. The Coastal Marind Language. (Doctoral dissertation, Nanyang Technological University; 594pp.)
Pakendorf, B. (2010): Contact in Siberian Languages. In: Hickey, R. (ed.): The Handbook of Language Contact. Oxford: Blackwell Publishing: 714-737.
Peterson, John. 2010. Language contact in Jharkhand: Linguistic convergence between Munda and Indo-Aryan in eastern-central India. Himalayan Linguistics 9(2). 56-86.
Pupynina, Maria and Aralova, Natalia. 2021. Lower Kolyma multilingualism: Historical setting and sociolinguistic trend. International Journal of Bilingualism. 25(4) 1081-1101
Reesink, Ger and Dunn, Michael. Contact phenomena in Austronesian and Papuan languages. In Bill Palmer (ed) The Languages and Linguistics of the New Guinea Area: A Comprehensive Guide. Berlin, Boston: De Gruyter Mouton, 2017, pp. 939-985. https://doi.org/10.1515/9783110295252-009
Ross, Malcolm D. 1996. Contact-Induced Change and the Comparative Method: Cases from Papua New Guinea. In Mark Durie and Malcolm Ross (eds.), The comparative method reviewed: regularity and irregularity in language change. 180-217. New York/Oxford: Oxford: Oxford University Press.
Ross, Malcolm D. 1996. Contact-induced change and the comparative method. In Durie, Mark (ed.), The comparative method reviewed, 180-217. New York: Oxford University Press.
San Roque, Lila & Loughnane, Robyn. (2012). The New Guinea Highlands evidentiality area. Linguistic Typology. 16. 10.1515/lity-2012-0003.
Sansò, Andrea. 2011. Mediterranean languages. In Kortmann, Bernd and Johan van der Auwera (eds) The languages and linguistics of Europe: A comprehensive Guide. Berlin: Mouton de Gruyter
Shaul, D.L., & Ortman, S.G. (2014). A Prehistory of Western North America: The Impact of Uto-Aztecan Languages. Albuquerque: UNM Press.
Singer, R., Harris, S., 2016.What practices and ideologies support small-scale multilingualism? a case study of unexpected language survival in an Australian Indigenous community. International Journal of the Sociology of Language 241, 163–208.
Smith-Dennis, E. (2021). A Grammar of Papapana. Berlin, Boston: De Gruyter Mouton. Retrieved May 21, 2020, from https://www.degruyter.com/view/title/539070
Smith-Dennis, Ellen (2016) Contact-induced Change in a Highly Endangered Language of Northern Bougainville, Australian Journal of Linguistics, 36:3, 369-405, DOI: 10.1080/07268602.2015.1134300
Souag, Mostafa Lameen. 2010. Grammatical contact in the Sahara: Arabic, Berber, and Songhay in Tabelbala and Siwa. (Doctoral dissertation, University of London; 519pp.)
Treis, Yvonne. 2012. Switch-reference and Omotic-Cushitic language contact in southwest Ethiopia. Journal of Language Contact 5(1) 80–116.
Vaughan, Jill. 2018. “We talk in saltwater words”: Dimensionalisation of dialectal variation in multilingual Arnhem Land. Language & Communication 62. 119-132
Vidal, Alejandra & Braunstein, José. (2020). The Southern Plains and the Continental Tip. In Tom Güldemann, Patrick McConvell and Richard A. Rhodes (eds) The Language of Hunter-Gatherers. 641-669. Cambridge: Cambridge University Press.
Virkel, A. (2005). La conversación en comunidades mapuche-tehuelches. Contacto dialectal e interculturalidad/Conversation in Mapuche-Tehuelche Communities. Dialectical Contact and Interculturality. Anclajes, 9(9), 263-280.
Ziegelmeyer, Georg. 2015. Areal diffusion in the Chadic-Kanuri contact zone. Paper presented at the Workshop “Areal phenomena in northern sub-Sahara Africa” at the 8th World Congress of African Linguistics, Kyoto University, 20–24 August.

## Sheet: Abbreviations
Abbreviation	Language families (Glottolog)	FL	NL
ACG	Atlantic-Congo	3
AET	Athabaskan-Eyak-Tlingit		1
AFA	Afro-Asiatic	4	3
AIK	Aikanã		1
ALG	Algic	1	1
ANM	Anim	1
ARC	Araucanian		1
ATC	Austroasiatic	2	1
AUN	Austronesian	3
AWK	Arawak	1	1
BAS	Basque		1
CCY	Cochimi-Yuman		1
CHN	Chonan	1
CHU	Chukotko-Kamchatkan		1
CRB	Cariban	1
DRA	Dravidian		1
DUN	Duna		1
ESK	Eskimo-Aleut	3
ETF	Eastern Trans-Fly		1
GUA	Guaicuruan	1
GUN	Gunwinyguan		1
IEU	Indo-European	3	5
IWA	Iwaidjan	1
KES	Keresan		1
KKW	Khoe-Kwadi		1
KWT	Kiowa-Tanoan	1
KYH	Karok		1
LMC	Lengua-Mascoy		1
MDE	Mande		1
MLK	Mongolic-Khitan		1
MNG	Maningridan	1
MRR	Marori		1
MTC	Matacoan	1	1
MUS	Muskogean	1
MYN	Mayan		1
NDU	Ndu		1
NHP	Naduhup	1
NOL	North Bougainville		1
NTN	Nuclear-Trans-New-Guinea	2
NUB	Nubian	1
NYY	Nyulnyulan	1
PHR	Pahoturi		1
PMN	Pama-Nyungan	1	2
QUE	Quechuan	1
SAH	Saharan		1
SEP	Sepik	1	1
SGY	Songhay	1
SLS	Salishan	1
SMC	South Omotic		1
STB	Sino-Tibetan	2
SUR	Surmic	1
SUX	Siouan		1
TAI	Tai-Kadai		1
TCA	Tucanoan		1
TLP	Timor-Alor-Pantar		1
TNO	Ta-Ne-Omotic		1
TPN	Tupian	1
TRM	Trumai		1
TSI	Tungusic	1
TUK	Turkic	1	2
UAZ	Uto-Aztecan	3
WAK	Wakashan		1
YAM	Yam	1
YKG	Yukaghir		1
ZUN	Zuni		1
		49	49
